# Supplementary material for: Evaluating newly acquired authority of nurse practitioners and physician assistants for reserved medical procedures in the Netherlands: a study protocol
Source: PubMed Central journal article supplement — J Adv Nurs. 2014 Mar 31;70(11):2673–82. doi: 10.1111/jan.12396 (PMC4263100; doi:10.1111/jan.12396), 2014-03-31
Supplement: jan0070-2673-SD2.pdf [file jan0070-2673-SD2.pdf]

Table S1: Domains in the AHP-model

|                                          |                                                  |
|------------------------------------------|--------------------------------------------------|
| <b>A Results of procedures:</b>          |                                                  |
|                                          | A1 Health improvement, right diagnosis           |
|                                          | A2 Complications                                 |
|                                          | A3 Patient satisfaction                          |
|                                          | A31 Procedure time                               |
|                                          | A32 Communication                                |
|                                          | A33 Waiting period until next appointment        |
|                                          | A34 Waiting period in waiting room               |
| <b>B Competency health professional:</b> |                                                  |
|                                          | B1 Education                                     |
|                                          | B2 Experience                                    |
| <b>C Risks of treatment:</b>             |                                                  |
|                                          | C1 Complexity                                    |
|                                          | C2 Types of patients                             |
|                                          | C3 Types of procedures                           |
| <b>D Costs</b>                           |                                                  |
| <b>E Organizational characteristics:</b> |                                                  |
|                                          | E1 Collaboration with physician                  |
|                                          | E11 Consultation                                 |
|                                          | E12 Authority                                    |
|                                          | E2 Protocols:                                    |
|                                          | E21 Clarity tasks, authorities, responsibilities |
|                                          | E22 Establishment procedures, patients, diseases |
